# Supplementary material for: Impact of Te on the structure and77Se NMR spectra of Se-rich Ge–Te–Se glasses: a combined experimental and computational investigation
Source: Royal Society of Chemistry journal article supplement (doi:10.1039/c5cp04416b), 2015-01-01
Supplement: c5cp04416b1.pdf [file c5cp04416b1.pdf]

## Supporting Information

# Impact of Tellurium on the Structure and $^{77}\text{Se}$ NMR Spectra of Selenium-Rich Ternary Ge-Te-Se Glasses: a combined experimental and computational investigation

Lila Bouéssel du Bourg,<sup>a</sup> Claire Roiland,<sup>b</sup> Laurent le Pollès,<sup>a</sup> Michaël Deschamps,<sup>c</sup>  
Catherine Boussard-Plédel,<sup>b</sup> Bruno Bureau,<sup>b</sup> Chris J. Pickard<sup>d</sup> and Eric Furet<sup>\*a</sup>

<sup>a</sup> Institut des Sciences Chimiques de Rennes - UMR6226 - ENSCR, 11 allée de Beaulieu, CS50837, 35708 Rennes Cedex 7, France

<sup>b</sup> Institut des Sciences Chimiques de Rennes - UMR6226, 263 avenue du Général Leclerc, 35042 Rennes Cedex, France

<sup>c</sup> CEMHTI, CNRS UPR 379, Orléans, France

<sup>d</sup> Department of Physics and Astronomy, University College London, Gower Street, London WC1E 6BT, UK

### Contents:

**Figure S1.**  $^{77}\text{Se}$  ssNMR spectrum of  $\text{Ge}_{20}\text{Se}_{20}\text{Te}_{60}$  acquired at 300MHz (7.1 T) using a 4 mm probe and MAS rotation conditions of 14kHz.

**Figure S2.** Histograms of the nature of the coordination numbers for the germanium atoms calculated on the 300K trajectories of our six Se-rich Ge-Te-Se models. First row, the three models ( $\text{R}_{\text{Se}1-3}$ ) derived from the first heterogeneous  $\text{GeSe}_4$  glass  $G_1$ . Second row, the three models  $\text{R}_{\text{Se}1'-3'}$  derived from the first heterogeneous  $\text{GeSe}_4$  glass  $G_2$ .

**Figure S3.** Individual radial distribution functions for our six Se-rich Ge-Te-Se glasses. The left column corresponds to the glasses derived from  $G_1$ , and the right column from the  $G_2$   $\text{GeSe}_4$  heterogeneous model.

**Figure S4.** Visualisation of two structures at 300K of our selenium-rich glasses derived from the  $G_1$  (left) and  $G_2$  (right) models together with tetrahedra for the Ge coordination spheres. (CS tetrahedra – grey, ES tetrahedra – orange). The germanium atoms are in red, the selenium atoms in yellow and the tellurium atoms in light blue.

**Figure S5.** Averaged Se-Te radial distribution functions (solid line) and their integrations (dotted line) for the three Ge-Te-Se glasses derived from  $G_1$  (black) and the three other derived from  $G_2$  (red).

**Table S1.** Coordination numbers for the germanium atoms calculated on the 300K trajectories of our six Se-rich Ge-Te-Se models. First row, the three models  $\text{R}_{\text{Se}1-3}$  derived from the first heterogeneous  $\text{GeSe}_4$  glass  $G_1$ . Second row, the three models  $\text{R}_{\text{Se}1'-3'}$  derived from the second glass  $G_2$ .

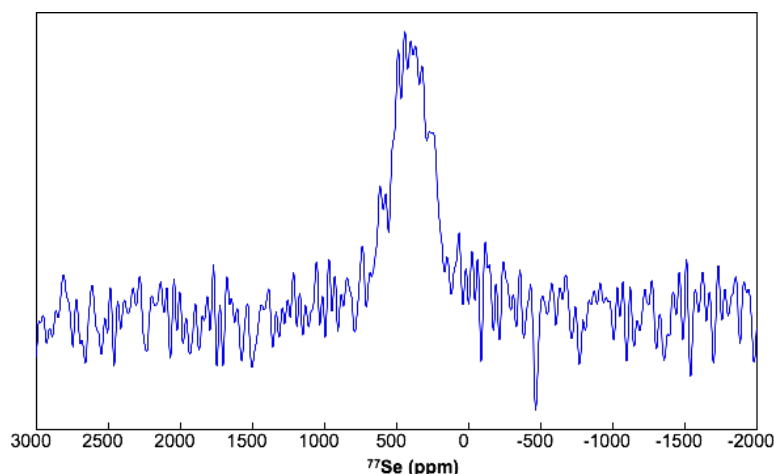

**Figure S1.**  $^{77}\text{Se}$  ssNMR spectrum of  $\text{Ge}_{20}\text{Se}_{20}\text{Te}_{60}$  acquired at 300MHz (7.1 T) using a 4 mm probe and MAS rotation conditions of 14kHz.

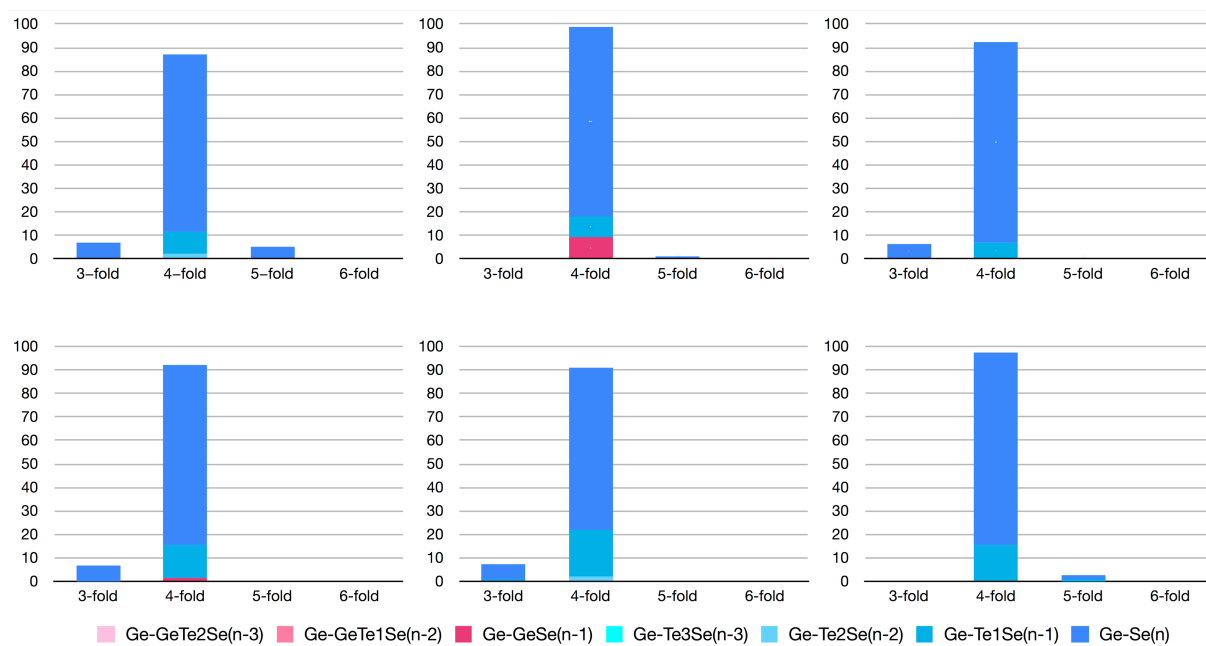

**Figure S2.** Histograms of the nature of the coordination numbers for the germanium atoms calculated on the 300K trajectories of our six Se-rich Ge-Te-Se models. First row, the three models ( $R_{\text{Se}1-3}$ ) derived from the first heterogeneous  $\text{GeSe}_4$  glass  $G_1$ . Second row, the three models  $R_{\text{Se}1'-3'}$  derived from the first heterogeneous  $\text{GeSe}_4$  glass  $G_2$ .

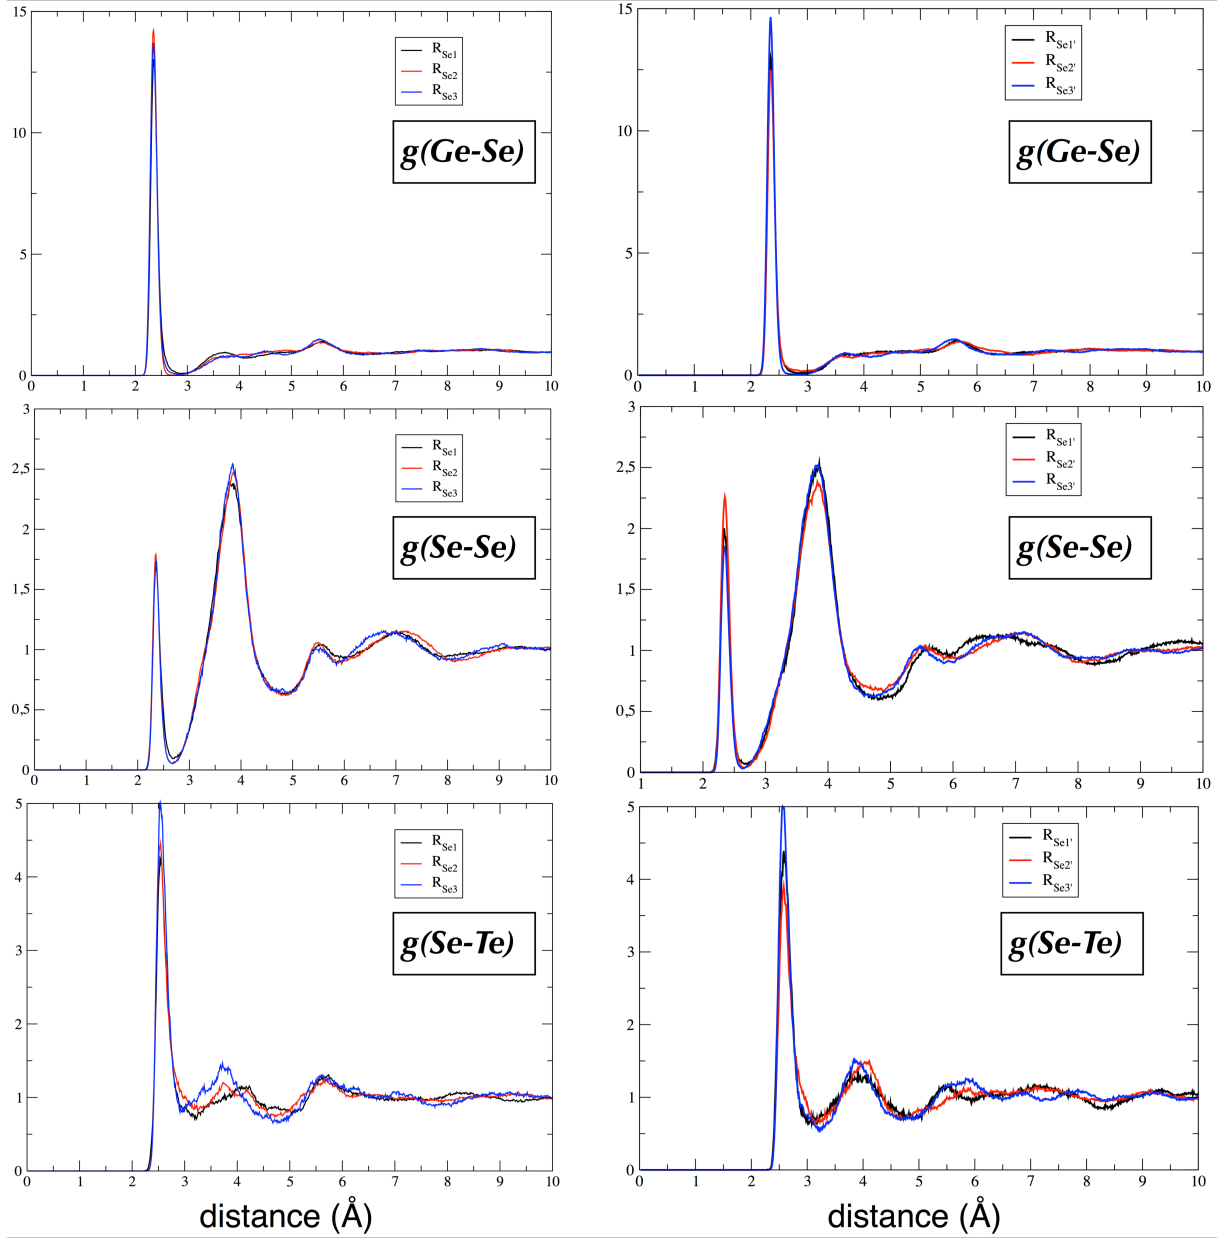

**Figure S3.** Individual radial distribution functions for our six Se-rich Ge-Te-Se glasses. The left column corresponds to the glasses derived from  $G_I$ , and the right column from the  $G_2$   $\text{GeSe}_4$  heterogeneous model.

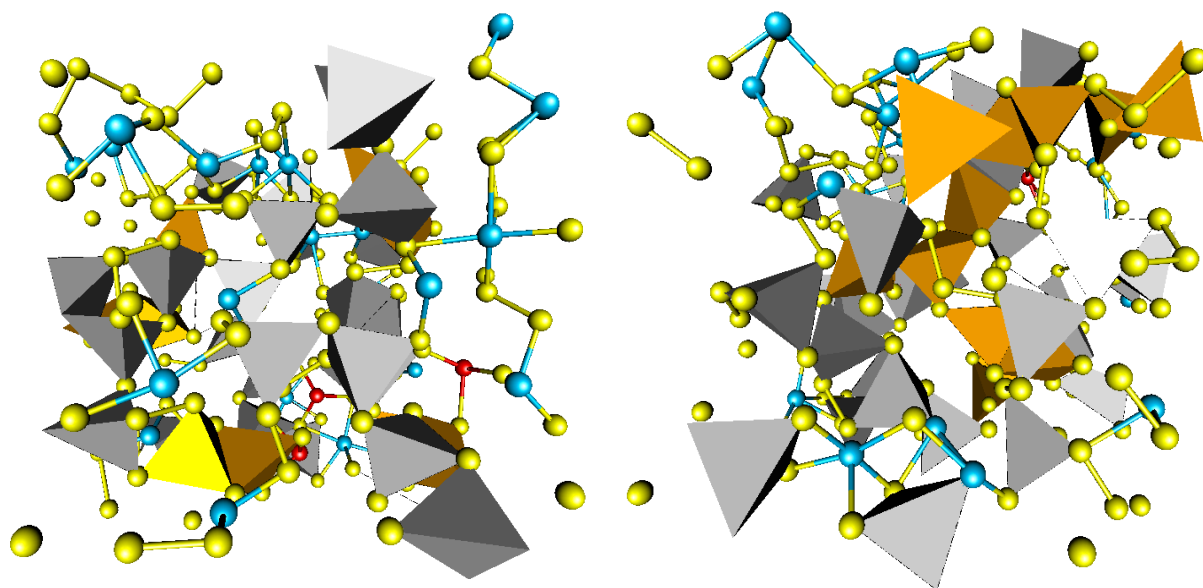

**Figure S4.** Visualisation of two structures at 300K of our selenium-rich glasses derived from the  $G_1$  (left) and  $G_2$  (right) models together with tetrahedra for the Ge coordination spheres. (CS tetrahedra – grey, ES tetrahedra – orange). The germanium atoms are in red, the selenium atoms in yellow and the tellurium atoms in light blue.

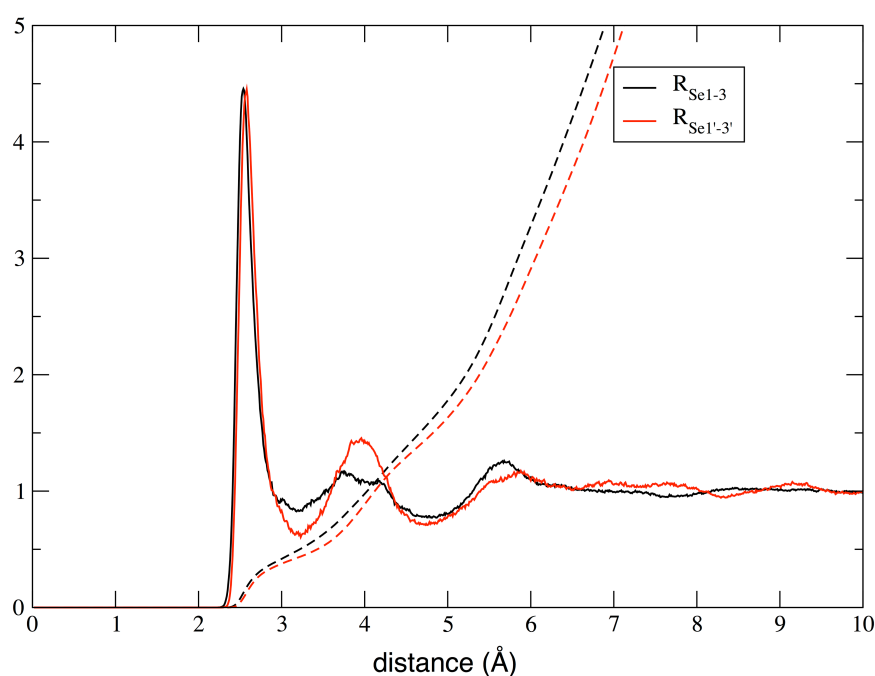

**Figure S5.** Averaged Se-Te radial distribution functions (solid line) and their integrations (dotted line) for the three Ge-Te-Se glasses derived from  $G_1$  (black) and the three other derived from  $G_2$  (red).

**Table S1.** Coordination numbers for the germanium atoms calculated on the 300K trajectories of our six Se-rich Ge-Te-Se models. First row, the three models  $R_{\text{Se}1-3}$  derived from the first heterogeneous  $\text{GeSe}_4$  glass  $G_1$ . Second row, the three models  $R_{\text{Se}1'-3'}$  derived from the second glass  $G_2$ .

|               | n=3  | n=4   | n=5  |              |  | n=3 | n=4   | n=5  |              |  | n=3  | n=4   | n=5  |              |
|---------------|------|-------|------|--------------|--|-----|-------|------|--------------|--|------|-------|------|--------------|
| Ge-GeSe(n-1)  |      |       |      |              |  |     | 9,23  |      | 9,23         |  |      |       |      |              |
| Ge-Te2Se(n-2) |      | 2,26  |      | 2,26         |  |     |       |      |              |  |      |       |      |              |
| Ge-TeSe(n-1)  |      | 9,28  |      | 9,28         |  |     | 8,90  | 0,43 | 9,33         |  |      | 6,80  |      | 6,80         |
| Ge-Se(n)      | 6,83 | 75,69 | 5,46 | 87,98        |  |     | 80,91 | 0,46 | 81,37        |  | 6,51 | 85,79 | 0,37 | 92,67        |
| <b>Sum</b>    | 6,83 | 87,23 | 5,46 | <b>99,52</b> |  | 0   | 99,04 | 0,89 | <b>99,93</b> |  | 6,51 | 92,59 | 0,37 | <b>99,47</b> |

|               | n=3  | n=4   | n=5  |              |  | n=3  | n=4   | n=5  |              |  | n=3 | n=4   | n=5  |              |
|---------------|------|-------|------|--------------|--|------|-------|------|--------------|--|-----|-------|------|--------------|
| Ge-GeSe(n-1)  |      | 1,53  |      | 1,53         |  |      |       |      |              |  |     |       |      |              |
| Ge-Te2Se(n-2) |      |       |      |              |  |      | 2,33  |      | 2,33         |  |     |       |      |              |
| Ge-TeSe(n-1)  | 0,02 | 13,87 | 0,11 | 14,00        |  | 0,83 | 19,65 | 0,56 | 21,04        |  |     | 15,38 | 0,92 | 16,3         |
| Ge-Se(n)      | 6,89 | 76,52 | 0,35 | 83,76        |  | 6,48 | 68,97 | 0,22 | 75,67        |  |     | 81,88 | 1,81 | 83,69        |
| <b>Sum</b>    | 6,91 | 91,92 | 0,46 | <b>99,29</b> |  | 7,31 | 90,95 | 0,78 | <b>99,04</b> |  | 0   | 97,26 | 2,73 | <b>99,99</b> |
